# Supplementary material for: Blood as a route of transmission of uterine pathogens from the gut to the uterus in cows
Source: PubMed Central journal article supplement (PMC5574159; doi:10.1186/s40168-017-0328-9), 2017-08-25
Supplement: 40168_2017_328_MOESM8_ESM.pdf [file 40168_2017_328_MOESM8_ESM.pdf]

**Table S4** Primer information for ddPCR.

| Target                             | Gene        | Sequence (5' - 3')                                 | Length (bp) | Reference                |
|------------------------------------|-------------|----------------------------------------------------|-------------|--------------------------|
| All bacteria                       | 16S rRNA    | F: ACTCCTACGGGAGGCAGCAGT<br>R: TATTACCGCGGCTGCTGGC | 180         | Clifford et al. (2012) † |
| <i>Bacteroides heparinolyticus</i> | 16S rRNA    | F: TAGCTTGCTAAGCCCGATGG<br>R: TACCGGAGTTACCGGAAGGT | 72          | This study               |
| <i>Fusobacterium necrophorum</i>   | <i>lktA</i> | F: GATTGGGGGATAGCGGTAAT<br>R: GAGCCTCCACATTTAGTCGC | 117         | This study               |

† Clifford RJ, Milillo M, Prestwood J, Quintero R, Zurawski DV, Kwak YI, et al. Detection of bacterial 16S rRNA and identification of four clinically important bacteria by real-time PCR. PLoS One. 2012;7: e48558. doi: 10.1371/journal.pone.0048558 [doi].
